# Supplementary material for: Multivalent non-covalent interactions lead to strongest polymer adhesion
Source: Royal Society of Chemistry journal article supplement (doi:10.1039/d1nr08338d), 2022-01-01
Supplement: d1nr08338d1.pdf [file d1nr08338d1.pdf]

## Supplementary Information for Multivalent non-covalent interactions lead to strongest polymer adhesion

Max Lallemand<sup>a,b</sup>, Leixiao Yu<sup>c</sup>, Wanhao Cai<sup>a</sup>, Klaus Rischka<sup>d</sup>, Andreas Hartwig<sup>d,e</sup>, Rainer Haag<sup>c</sup>,  
Thorsten Hugel<sup>a,b,\*</sup>, Bizan N. Balzer<sup>a,b,f,\*</sup>

<sup>a</sup>*Institute of Physical Chemistry, University of Freiburg, Albertstraße 21, 79104 Freiburg, Germany.*

<sup>b</sup>*Cluster of Excellence livMatS @ FIT-Freiburg Center for Interactive Materials and Bioinspired Technologies, University of Freiburg, Georges-Köhler-Allee 105, 79110 Freiburg, Germany*

<sup>c</sup>*Institute of Chemistry and Biochemistry, Freie Universität Berlin, Takusstraße 3, 14195 Berlin, Germany*

<sup>d</sup>*Fraunhofer Institute for Manufacturing Technology and Advanced Materials IFAM, Wiener Straße 12, 28359 Bremen, Germany*

<sup>e</sup>*University of Bremen, Department 2 Biology/Chemistry, Leobener Straße 3, 28359 Bremen, Germany*

<sup>f</sup>*Freiburg Materials Research Center (FMF), Albert Ludwig University of Freiburg, 79104 Freiburg, Germany*

\* Bizan N. Balzer, Thorsten Hugel.

**Email:** [bizan.balzer@physchem.uni-freiburg.de](mailto:bizan.balzer@physchem.uni-freiburg.de), [thorsten.hugel@physchem.uni-freiburg.de](mailto:thorsten.hugel@physchem.uni-freiburg.de)

### This PDF file includes:

Supplementary text  
Figures S1 to S10  
Table S1  
SI References

## 1. AFM cantilever tip functionalization

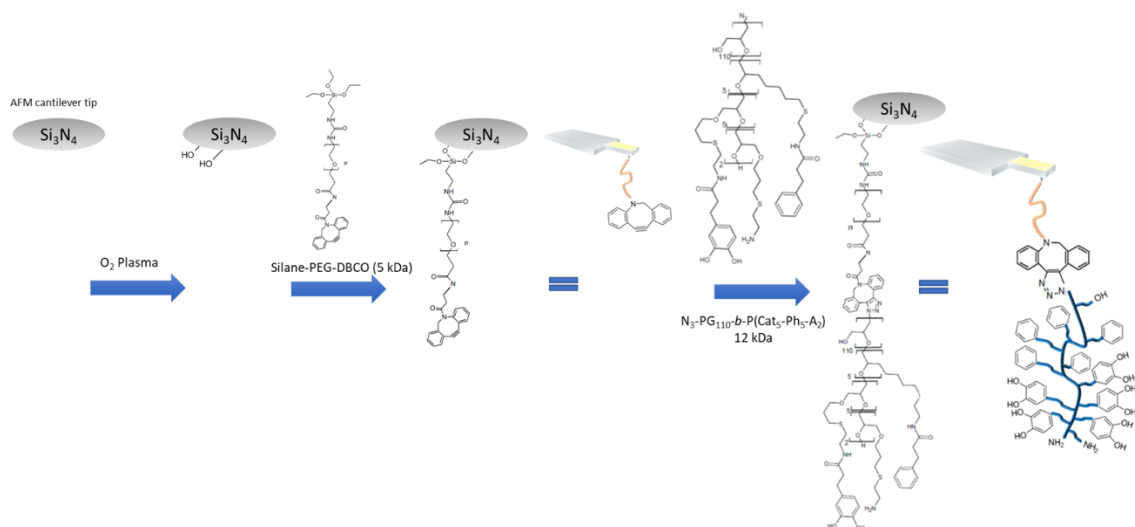

**Fig. S1. Functionalization of an AFM cantilever tip.** To obtain a covalently bound  $\text{PG}_{110}\text{-b-P(Cat}_5\text{-Ph}_5\text{-A}_2)$  molecular force sensor, oxygen plasma treatment, silane-PEG-DBCO (5 kDa) and  $\text{N}_3\text{-PG}_{110}\text{-b-P(Cat}_5\text{-Ph}_5\text{-A}_2)$  (12 kDa) were used.

## 2. Contact angle measurements

To further characterize the presence of  $\text{N}_3\text{-PG}_{110}\text{-}b\text{-P}(\text{Cat}_5\text{-Ph}_5\text{-A}_2)$  layers on a  $\text{TiO}_2$  substrate, contact angle measurements were performed using a homebuilt goniometer. The control samples were  $\text{TiO}_2$  incubated in the pure solvent (MOPS buffer pH 6.0, 0.1 M) instead of the polymer solution. Ten droplets of  $\text{H}_2\text{O}$  (1  $\mu\text{L}$ ) were put on each layer. For each droplet, the contact angle was determined using the distance tool of the software *Gwyddion 2.47*.<sup>1</sup> Finally, the average value and standard deviation were calculated (Fig. S2). The presence of  $\text{N}_3\text{-PG}_{110}\text{-}b\text{-P}(\text{Cat}_5\text{-Ph}_5\text{-A}_2)$  layers increased the hydrophilicity and therefore the contact angle became smaller.

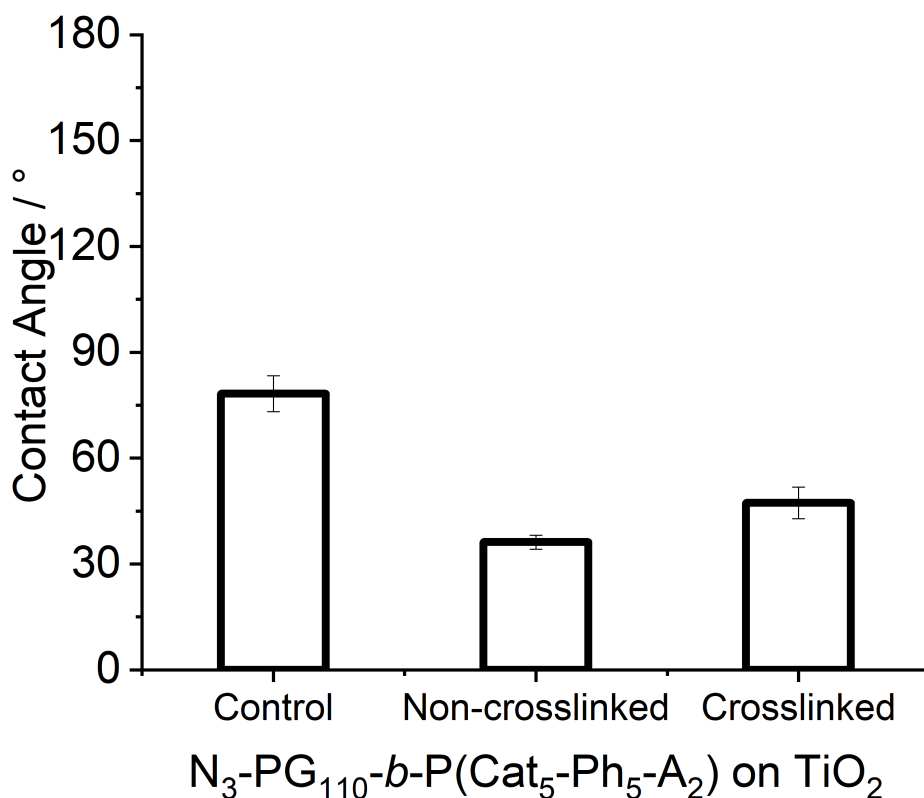

**Fig. S2.** Contact angle measurements of a non-crosslinked  $\text{N}_3\text{-PG}_{110}\text{-}b\text{-P}(\text{Cat}_5\text{-Ph}_5\text{-A}_2)$  layer on  $\text{TiO}_2$ , a crosslinked  $\text{N}_3\text{-PG}_{110}\text{-}b\text{-P}(\text{Cat}_5\text{-Ph}_5\text{-A}_2)$  layer on  $\text{TiO}_2$  and bare  $\text{TiO}_2$  as a control. The control samples on  $\text{TiO}_2$  were incubated in the pure solvent (MOPS buffer pH 6.0, 0.1 M) instead of the polymer solution. The contact angles amounted to  $(78 \pm 5)^\circ$  for the control,  $(36 \pm 2)^\circ$  for the non-crosslinked layer and  $(47 \pm 5)^\circ$  for the crosslinked layer.

### 3. Thickness determination of a $N_3$ -PG<sub>110</sub>-*b*-P(Cat<sub>5</sub>-Ph<sub>5</sub>-A<sub>2</sub>) layer on TiO<sub>2</sub> by AFM-based scratching

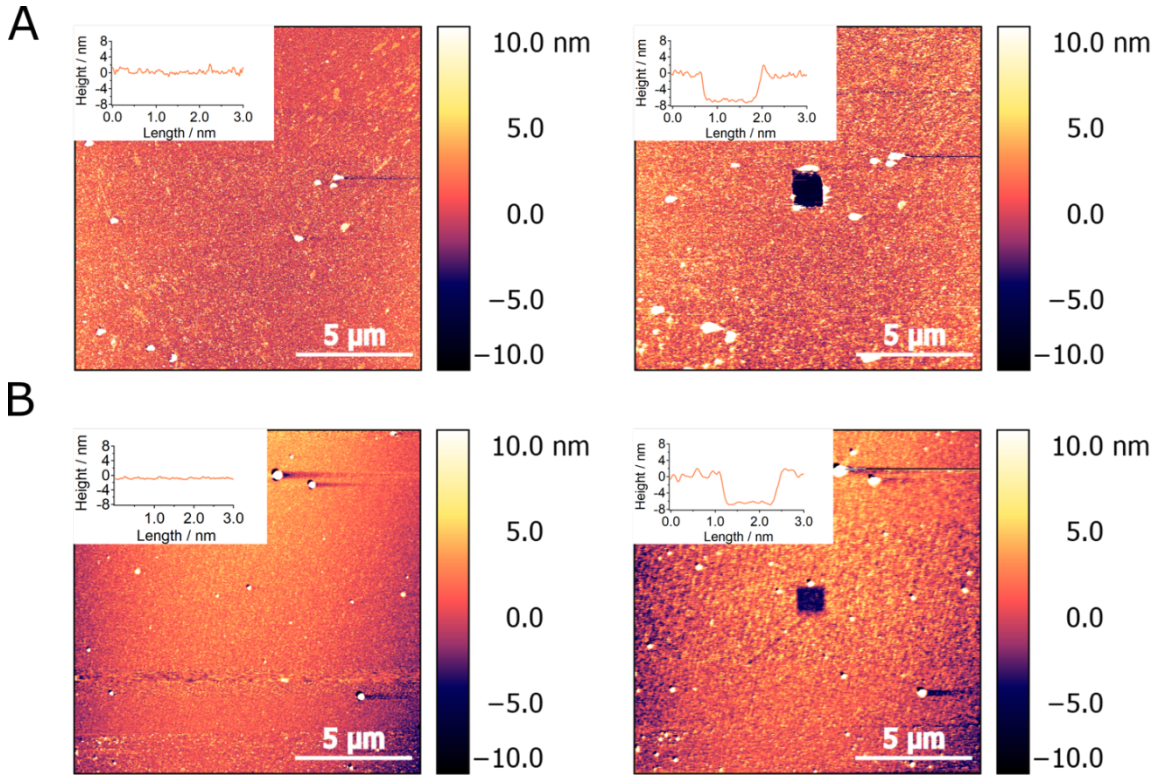

**Fig. S3. Scratching of a  $N_3$ -PG<sub>110</sub>-*b*-P(Cat<sub>5</sub>-Ph<sub>5</sub>-A<sub>2</sub>) layer on TiO<sub>2</sub>.** Imaging of the layer with a scan size of 15•15 μm<sup>2</sup> (left). Imaging of the layer after the scratch with a scan size of 15•1 μm<sup>2</sup> (right). A scan rate of 2 Hz was used for all images. **A.** The thickness of a non-crosslinked  $N_3$ -PG<sub>110</sub>-*b*-P(Cat<sub>5</sub>-Ph<sub>5</sub>-A<sub>2</sub>) layer on TiO<sub>2</sub> in buffer (pH 6.0) amounted to (8.5 ± 0.7) nm. **B.** A crosslinked layer on TiO<sub>2</sub> in buffer (pH 6.0) showed a thickness of (6.8 ± 0.9) nm.

## 4. Force spectroscopy

### 4a. PG<sub>110</sub>-*b*-P(Cat<sub>5</sub>-Ph<sub>5</sub>-A<sub>2</sub>) molecular force sensor on SiO<sub>2</sub>

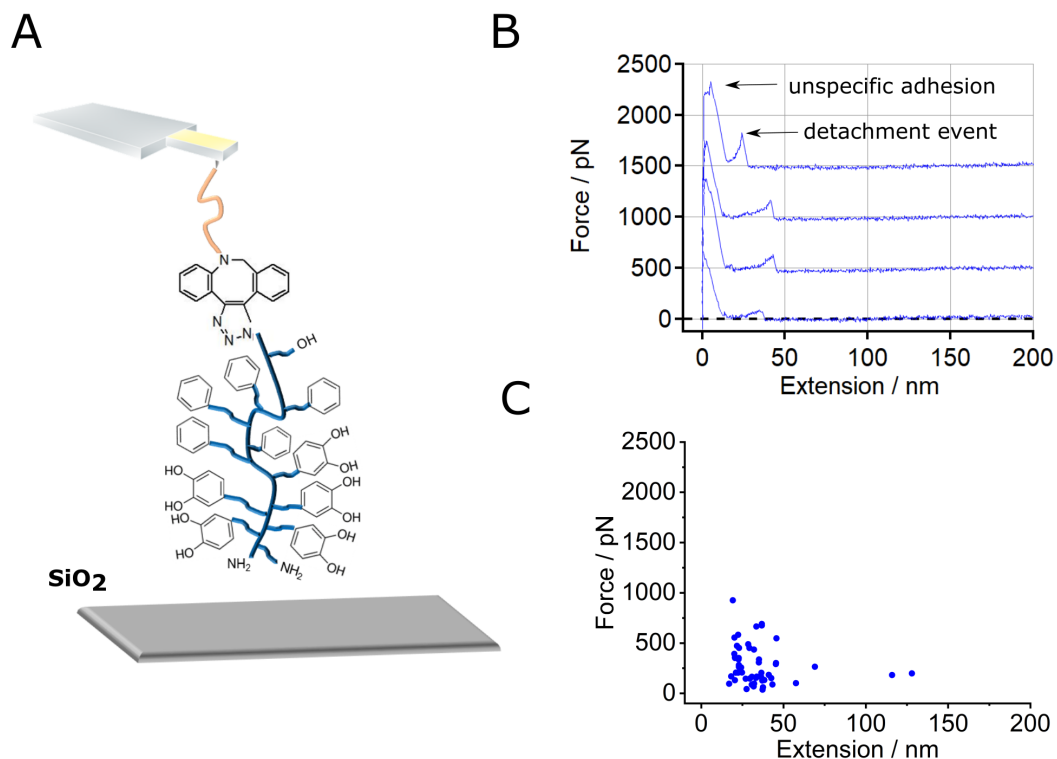

**Fig. S4. PG<sub>110</sub>-*b*-P(Cat<sub>5</sub>-Ph<sub>5</sub>-A<sub>2</sub>) molecular force sensor on SiO<sub>2</sub>.** **A.** Scheme of the experiment. An AFM cantilever tip was functionalized with silane-PEG-DBCO (linker) and N<sub>3</sub>-PG<sub>110</sub>-*b*-P(Cat<sub>5</sub>-Ph<sub>5</sub>-A<sub>2</sub>) and measured on SiO<sub>2</sub> in H<sub>2</sub>O with a contact force of 500 pN and a contact time of 1 s. **B.** Representative force-extension curves. Out of 200 force-extension curves, 40 showed convex stretch events (20 %), 6 curves showed double convex stretches (3 %) and 5 curves showed multiple stretches (3 %). There were no concave stretches or plateaus. The curves were offset by 500 pN for graphical presentation. **C.** Scatter plot showing the detachment force distribution (including all peaks except unspecific adhesion) vs the detachment position. The average detachment force showed a value of  $(276 \pm 192)$  pN and the average detachment position a value of  $(34 \pm 20)$  nm.

#### 4b. PEG-DBCO molecular force sensor on SiO<sub>2</sub>

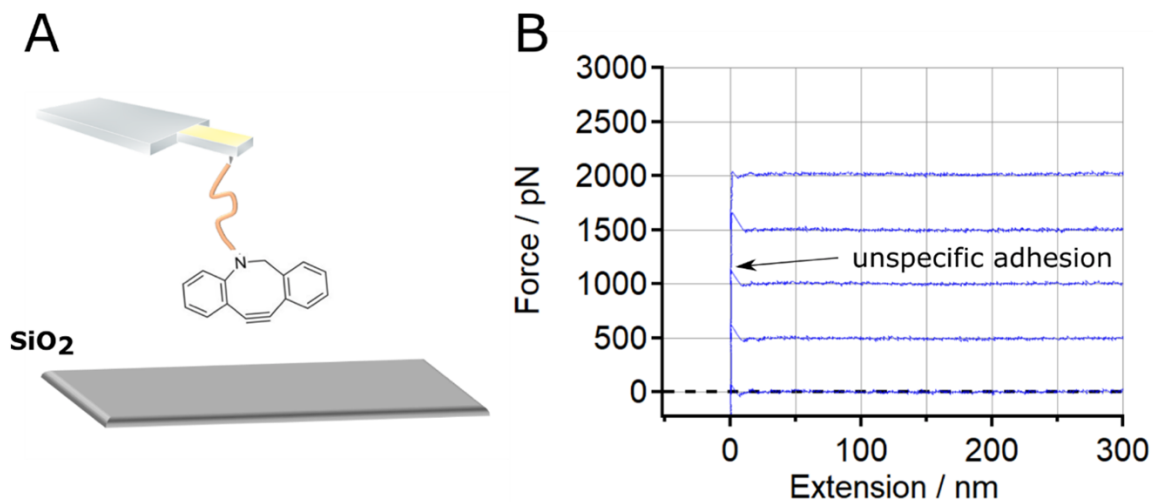

**Fig. S5. PEG-DBCO molecular force sensor on SiO<sub>2</sub>.** **A.** Scheme of the experiment. An AFM cantilever was functionalized with silane-PEG-DBCO and measured on SiO<sub>2</sub> in H<sub>2</sub>O with a contact force of 500 pN and a contact time of 1 s. **B.** Force-extension curves of silane-PEG-DBCO on SiO<sub>2</sub>. Out of 200 curves, there were no curves with concave or convex stretches or plateaus. The curves were offset by 500 pN for graphical presentation.

#### 4c. Contact force vs contact time for a PG<sub>110</sub>-*b*-P(Cat<sub>5</sub>-Ph<sub>5</sub>-A<sub>2</sub>) molecular force sensor on a N<sub>3</sub>-PG<sub>110</sub>-*b*-P(Cat<sub>5</sub>-Ph<sub>5</sub>-A<sub>2</sub>) layer on TiO<sub>2</sub>

In order to understand the timescales involved in the formation of bonds between a PG<sub>110</sub> - *b*-P(Cat<sub>5</sub>-Ph<sub>5</sub>-A<sub>2</sub>) molecular force sensor and a N<sub>3</sub>-PG<sub>110</sub>-*b*-P(Cat<sub>5</sub>-Ph<sub>5</sub>-A<sub>2</sub>) layer on TiO<sub>2</sub>, we varied the contact time of the molecular force sensor on the layer and the contact force with which the AFM cantilever tip was pressed against this layer (Fig. S6).

As a control, we started with a contact force of 50 pN (below the breakthrough force) with contact times of 0 s, 1 s and 10 s. The real contact time (comprising dwell and contact during approach and retract of the AFM cantilever tip) for 0 s is 0.02 s for 50 pN, 0.05 s for 500 pN and 0.09 s for 3000 pN. For 1 s, the real contact times are 1.02 s for 50 pN, 1.04 s for 500 pN and 1.09 s for 3000 pN. Finally, a contact time of 10 s means a real contact time of 10.02 s for 50 pN, 10.04 s for 500 pN and 10.07 s for 3000 pN.

The experiments with a contact force of 50 pN only showed force-extension curves with low detachment forces in the range of 100 pN (Fig. S7). Only an increase of the contact force to 500 pN (above the breakthrough force) led to a noticeable increase in the detachment forces, reaching values greater than 2000 pN (Fig. S7). This is in accordance with the repelling properties assigned to N<sub>3</sub>-PG<sub>110</sub>-*b*-P(Cat<sub>5</sub>-Ph<sub>5</sub>-A<sub>2</sub>) layers.<sup>2</sup>

Increasing the contact force further to a value of 3000 pN revealed diverse types of force-extension curves (see also Fig. 1d). We interpret this as a higher probability for the interactions between the functional groups of PG<sub>110</sub>-*b*-P(Cat<sub>5</sub>-Ph<sub>5</sub>-A<sub>2</sub>) on the AFM cantilever tip and the N<sub>3</sub>-PG<sub>110</sub>-*b*-P(Cat<sub>5</sub>-Ph<sub>5</sub>-A<sub>2</sub>) layer. In that respect, we observed a significant amount of desorption plateaus as well as multiple plateaus. The highest number of convex stretches (35 %) was obtained for a contact time of 10 s and a contact force of 3000 pN. We believe that the increase of contact time results in a strengthening of the interactions between catechol groups of the PG<sub>110</sub>-*b*-P(Cat<sub>5</sub>-Ph<sub>5</sub>-A<sub>2</sub>) molecular force sensor and the N<sub>3</sub>-PG<sub>110</sub>-*b*-P(Cat<sub>5</sub>-Ph<sub>5</sub>-A<sub>2</sub>) layer. Indentation curves as the one given in Figure 1c, reveal that contact forces of at least 200 to 400 pN were necessary for a characteristic break-through of the N<sub>3</sub>-PG<sub>110</sub>-*b*-P(Cat<sub>5</sub>-Ph<sub>5</sub>-A<sub>2</sub>) layer.

Based on these results, we chose a contact time of 1 s and a contact force of 500 pN as threshold values for further measurements, which is a good compromise between monitoring a great number of interactions and preventing a too high number of overlapping interactions (resulting in overlapping detachment events) rendering the force-extension curves uninterpretable.

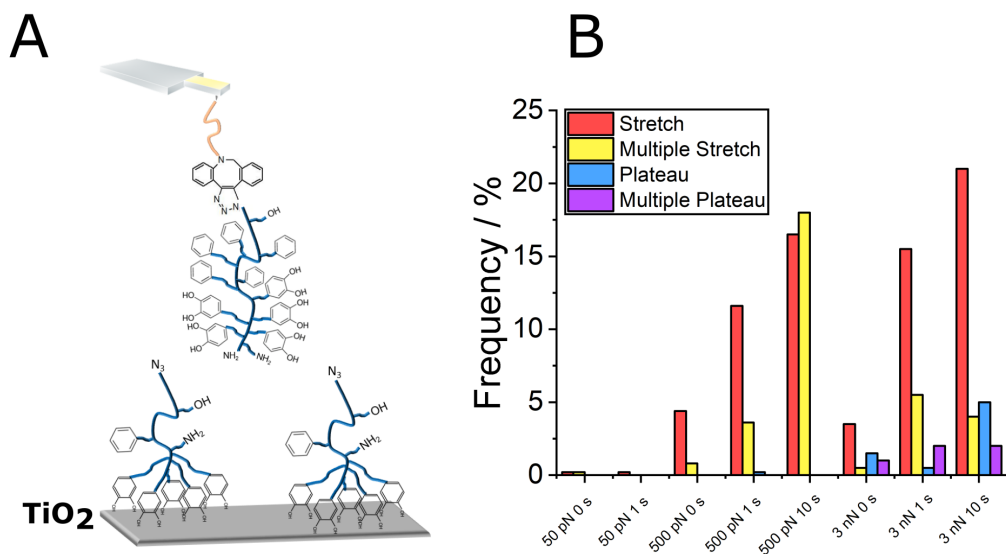

**Fig. S6. Effect of contact force and contact time for a PG<sub>110</sub>-*b*-P(Cat<sub>5</sub>-Ph<sub>5</sub>-A<sub>2</sub>) molecular force sensor on a non-crosslinked N<sub>3</sub>-PG<sub>110</sub>-*b*-P(Cat<sub>5</sub>-Ph<sub>5</sub>-A<sub>2</sub>) layer on TiO<sub>2</sub>.** **A.** Scheme of a PG<sub>110</sub>-*b*-P(Cat<sub>5</sub>-Ph<sub>5</sub>-A<sub>2</sub>) molecular force sensor on a non-crosslinked N<sub>3</sub>-PG<sub>110</sub>-*b*-P(Cat<sub>5</sub>-Ph<sub>5</sub>-A<sub>2</sub>) layer on TiO<sub>2</sub>. **B.** Frequency of the different curve types, showing stretches, multiple stretches, plateaus and multiple plateaus is given for different contact forces (50 pN, 500 pN, 3000 pN) and different contact times (0 s, 1 s, 10 s). The experiments were performed in H<sub>2</sub>O. The frequency has been scaled to the total number of curves taken (200 for each condition).



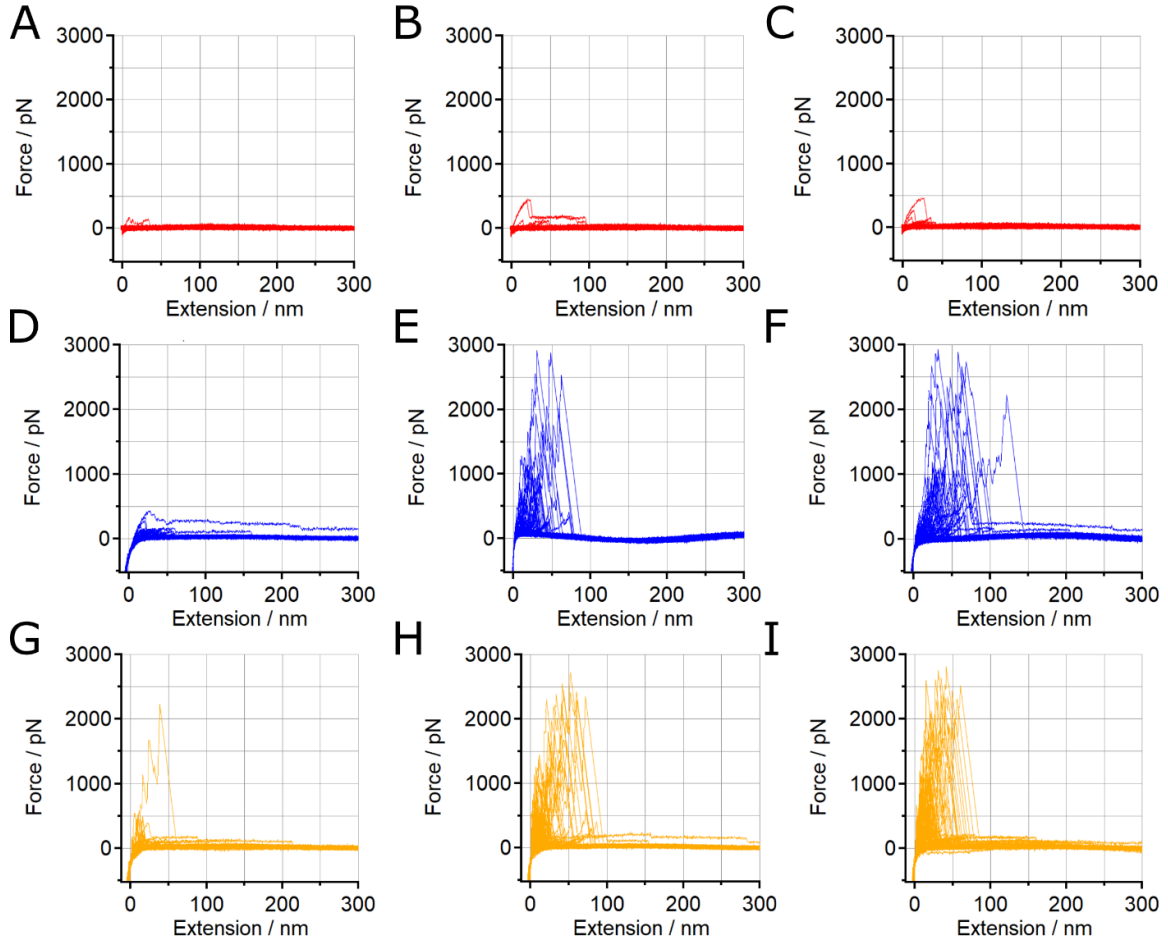

**Fig. S7.** PG<sub>110</sub>-*b*-P(Cat<sub>5</sub>-Ph<sub>5</sub>-A<sub>2</sub>) molecular force sensor on a N<sub>3</sub>-PG<sub>110</sub>-*b*-P(Cat<sub>5</sub>-Ph<sub>5</sub>-A<sub>2</sub>) layer on TiO<sub>2</sub> with different contact forces (50 pN, 500 pN, 3000 pN) and different contact times (0 s, 1 s, 10 s) measured in H<sub>2</sub>O. **A.** 50 pN, 0 s **B.** 50 pN, 1 s **C.** 50 pN, 10 s **D.** 500 pN, 0 s, **E.** 500 pN, 1 s, **F.** 500 pN, 10 s, **G.** 3000 pN, 0 s, **H.** 3000 pN, 1 s, **I.** 3000 pN, 10 s.

#### 4d. Force-extension curves with forces higher than 1500 pN

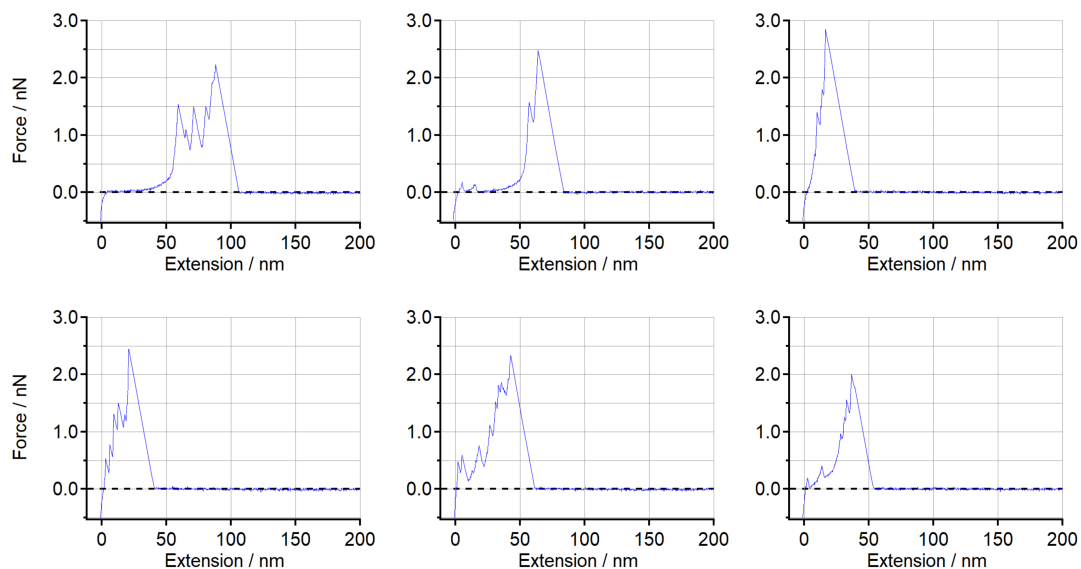

**Fig. S8. Exemplary force-extension curves for a  $\text{PG}_{110}\text{-}b\text{-P}(\text{Cat}_5\text{-Ph}_5\text{-A}_2)$  molecular force sensor on a  $\text{N}_3\text{-PG}_{110}\text{-}b\text{-P}(\text{Cat}_5\text{-Ph}_5\text{-A}_2)$  layer on  $\text{TiO}_2$  with detachment forces higher than 1500 pN. These force-extension curves were taken at the condition pH 8.6 crosslinked.**

**4e. Frequency of different force-extension motifs for a PG<sub>110</sub>-*b*-P(Cat<sub>5</sub>-Ph<sub>5</sub>-A<sub>2</sub>) molecular force sensor on a N<sub>3</sub>-PG<sub>110</sub>-*b*-P(Cat<sub>5</sub>-Ph<sub>5</sub>-A<sub>2</sub>) layer on TiO<sub>2</sub>**

The different types of force-extension curves for a PG<sub>110</sub>-*b*-P(Cat<sub>5</sub>-Ph<sub>5</sub>-A<sub>2</sub>) molecular force sensor on a N<sub>3</sub>-PG<sub>110</sub>-*b*-P(Cat<sub>5</sub>-Ph<sub>5</sub>-A<sub>2</sub>) layer on TiO<sub>2</sub> are listed in Table S1. The numbers indicate the absolute number of a certain type of detachment event, while the numbers in the brackets indicate the respective frequency of occurrence in % with respect to the total number of force-extension curves taken.

**Table S1. Number (frequency of occurrence) of the different force-extension curves for a PG<sub>110</sub>-*b*-P(Cat<sub>5</sub>-Ph<sub>5</sub>-A<sub>2</sub>) molecular force sensor on a N<sub>3</sub>-PG<sub>110</sub>-*b*-P(Cat<sub>5</sub>-Ph<sub>5</sub>-A<sub>2</sub>) layer on TiO<sub>2</sub>.**

| Condition           |                       | pH 6.0    | pH 8.6     | pH 8.6<br>crosslinked |
|---------------------|-----------------------|-----------|------------|-----------------------|
| Number of<br>events | Concave stretch       | 5 (1 %)   | 0 (0 %)    | 0 (0%)                |
|                     | Convex stretch        | 72 (14 %) | 110 (21 %) | 89 (17 %)             |
|                     | Double convex stretch | 11 (2 %)  | 39 (8 %)   | 23 (4 %)              |
|                     | Multiple stretch      | 39 (8 %)  | 35 (7 %)   | 15 (3 %)              |
|                     | Single plateau        | 3 (1 %)   | 0 (0 %)    | 1 (1 %)               |
|                     | Multiple plateaus     | 1 (1 %)   | 0 (0 %)    | 0 (0 %)               |

**4f. Number of detachment events for a  $\text{PG}_{110}\text{-}b\text{-P}(\text{Cat}_5\text{-Ph}_5\text{-A}_2)$  molecular force sensor on a  $\text{N}_3\text{-PG}_{110}\text{-}b\text{-P}(\text{Cat}_5\text{-Ph}_5\text{-A}_2)$  layer on  $\text{TiO}_2$**

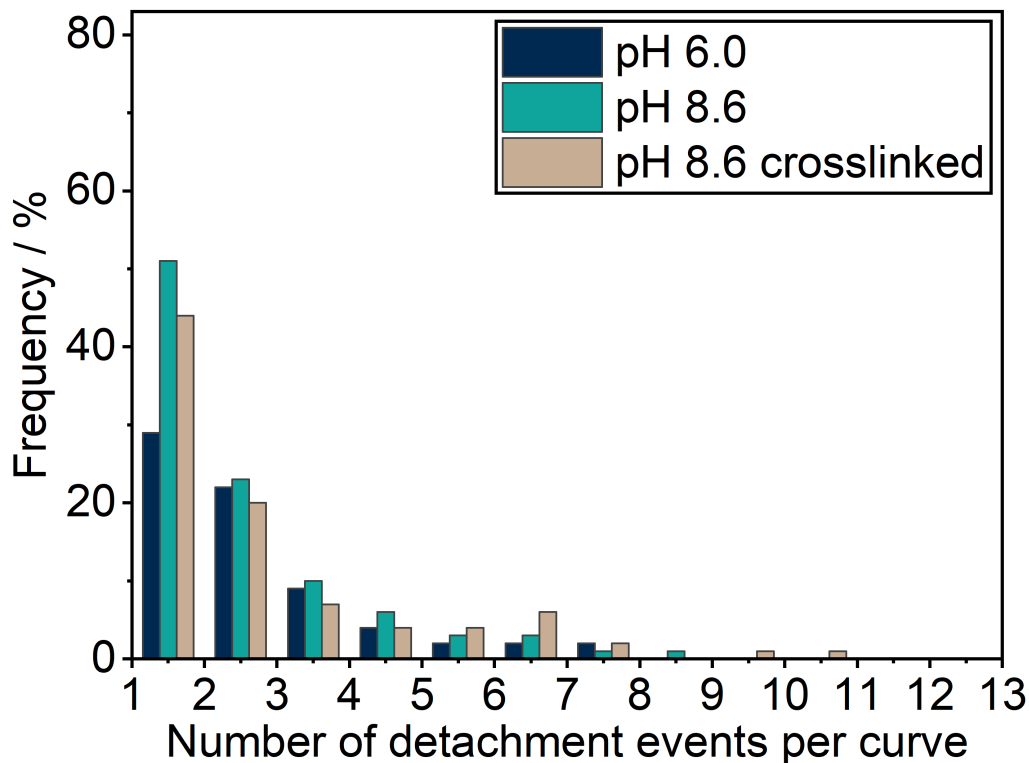

**Fig. S9. Number of detachment events per curve.** For a  $\text{PG}_{110}\text{-}b\text{-P}(\text{Cat}_5\text{-Ph}_5\text{-A}_2)$  molecular force sensor on a  $\text{N}_3\text{-PG}_{110}\text{-}b\text{-P}(\text{Cat}_5\text{-Ph}_5\text{-A}_2)$  layer on  $\text{TiO}_2$  the following number of force-extension curves was obtained: 70 at pH 6.0, 98 at pH 8.6 and 89 at pH 8.6 crosslinked.

#### 4g. Average energy per peak

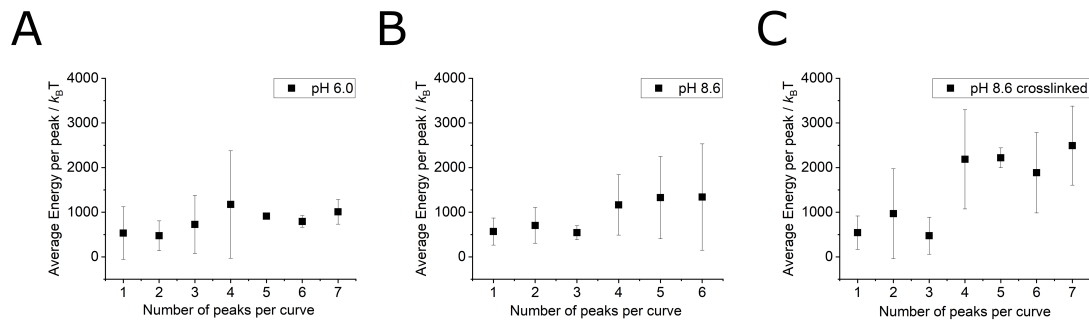

**Fig. S10. Average energy per peak as a function of the number of peaks per curve.** A PG<sub>110</sub> - *b*-P(Cat<sub>5</sub>-Ph<sub>5</sub>-A<sub>2</sub>) molecular force sensor on a N<sub>3</sub>-PG<sub>110</sub>-*b*-P(Cat<sub>5</sub>-Ph<sub>5</sub>-A<sub>2</sub>) layer on TiO<sub>2</sub> is shown for pH 6.0 (A), pH 8.6 (B) and pH 8.6 (C) crosslinked. The area between the force-extension curve and the baseline were determined by a trapezoidal integration.

## SI References

1. D. Nečas, P. Klapetek, Gwyddion: an open-source software for SPM data analysis. *Open Physics* 10, 181-188 (2012).
2. L. Yu, C. Cheng, Q. Ran, C. Schlaich, P.-L. M. Noeske, W. Li, Q. Wei and R. Haag, Bioinspired Universal Monolayer Coatings by Combining Concepts from Blood Protein Adsorption and Mussel Adhesion, *ACS Appl. Mater. Interfaces* 9, 6624-6633 (2017).
